# Supplementary material for: A Cell-Based Systems Biology Assessment of Human Blood to Monitor Immune Responses after Influenza Vaccination
Source: PLoS One. 2015 Feb 23;10(2):e0118528. doi: 10.1371/journal.pone.0118528 (PMC4338067; doi:10.1371/journal.pone.0118528)
Supplement: S8 Dataset — (XLSX) [file pone.0118528.s008.xlsx]

## Sheet: shared HD30-HD31 B cell AE d0-1
Up-regulated DE proteins (up ≥1.25x) shared between both TIV-vaccinated donors
	PBMC									T cell									NK									Monocytes									Neutrophils
	d0-1			d0-3			d0-7			d0-1			d0-3			d0-7			d0-1			d0-3			d0-7			d0-1			d0-3			d0-7			d0-1			d0-3			d0-7
	Ensembl Protein ID	Gene Name		Ensembl Protein ID	Gene Name		Ensembl Protein ID	Gene Name		Ensembl Protein ID	Gene Name		Ensembl Protein ID	Gene Name		Ensembl Protein ID	Gene Name		Ensembl Protein ID	Gene Name		Ensembl Protein ID	Gene Name		Ensembl Protein ID	Gene Name		Ensembl Protein ID	Gene Name		Ensembl Protein ID	Gene Name		Ensembl Protein ID	Gene Name		Ensembl Protein ID	Gene Name		Ensembl Protein ID	Gene Name		Ensembl Protein ID	Gene Name
	ENSP00000251595	HBA2		ENSP00000260641	ACTR2		ENSP00000269321	ARHGDIA		ENSP00000295688	CCT3		ENSP00000261210	TMPO		n/a	n/a		ENSP00000241052	CAT		ENSP00000440902	H2AFJ		ENSP00000472322	ECH1		ENSP00000354394	STAT1		ENSP00000216336	CTSG		ENSP00000397381	CAPG		n/a	n/a		ENSP00000384695	ALB		ENSP00000295897	ALB
	ENSP00000322421	HBA2		ENSP00000367220	ACTR2		ENSP00000383556	ARHGDIA					ENSP00000266732	TMPO					ENSP00000339566	HIST1H1C		ENSP00000340708	H2AFV		ENSP00000262746	PRDX1		ENSP00000376136	STAT1		ENSP00000222690	H2AFV		ENSP00000340708	H2AFV					ENSP00000401820	ALB		ENSP00000384695	ALB
	ENSP00000380899	HBA2		ENSP00000466975	ATP5A1		ENSP00000441348	ARHGDIA					ENSP00000340251	TMPO					ENSP00000244534	HIST1H1D		ENSP00000342714	H2AFV		ENSP00000361150	PRDX1		ENSP00000376137	STAT1		ENSP00000308405	H2AFV		ENSP00000342714	H2AFV					ENSP00000421027	ALB		ENSP00000401820	ALB
	ENSP00000380908	HBA2		ENSP00000433308	CFL1		ENSP00000461956	ARHGDIA					ENSP00000376773	TMPO					ENSP00000307705	HIST1H1E		ENSP00000397115	H2AFV		ENSP00000361152	PRDX1		ENSP00000386244	STAT1		ENSP00000340708	H2AFV		ENSP00000397115	H2AFV					ENSP00000426179	ALB		ENSP00000421027	ALB
	ENSP00000244573	HIST1H1A		ENSP00000436899	CFL1		ENSP00000462209	ARHGDIA					ENSP00000450627	TMPO					ENSP00000265062	RAB7A		ENSP00000344762	SRSF3		ENSP00000389047	PRDX1					ENSP00000342714	H2AFV		ENSP00000276079	NONO					ENSP00000450116	MYL6		ENSP00000422784	ALB
	ENSP00000330074	HIST1H1B		ENSP00000373730	H2AFJ		ENSP00000462323	ARHGDIA					ENSP00000309503	YWHAZ					ENSP00000417155	RAB7A		ENSP00000362820	SRSF3		ENSP00000407034	PRDX1					ENSP00000397115	H2AFV		ENSP00000362947	NONO					ENSP00000321259	TALDO1		ENSP00000426179	ALB
	ENSP00000341214	HIST1H1T		ENSP00000438553	H2AFJ		ENSP00000462960	ARHGDIA					ENSP00000379281	YWHAZ					ENSP00000417189	RAB7A		ENSP00000436036	SRSF3		ENSP00000368646	PRDX4					ENSP00000406901	H2AFV		ENSP00000362963	NONO					ENSP00000437098	TALDO1
	ENSP00000360305	PDLIM1		ENSP00000440902	H2AFJ		ENSP00000463530	ARHGDIA					ENSP00000379283	YWHAZ					ENSP00000417668	RAB7A					ENSP00000413736	PRDX4					ENSP00000296417	H2AFZ		ENSP00000409773	NONO					ENSP00000338703	UGP2
	ENSP00000472137	UBA52		ENSP00000222690	H2AFV		ENSP00000463939	ARHGDIA					ENSP00000379286	YWHAZ																	ENSP00000461791	P4HB		ENSP00000441364	NONO					ENSP00000377939	UGP2
				ENSP00000308405	H2AFV		ENSP00000464205	ARHGDIA					ENSP00000379287	YWHAZ																	ENSP00000431737	RPS3		ENSP00000327801	P4HB					ENSP00000411803	UGP2
				ENSP00000340708	H2AFV		ENSP00000373730	H2AFJ					ENSP00000379288	YWHAZ																	ENSP00000431834	RPS3		ENSP00000388374	P4HB					ENSP00000420793	UGP2
				ENSP00000342714	H2AFV		ENSP00000438553	H2AFJ					ENSP00000394880	YWHAZ																	ENSP00000432542	RPS3		ENSP00000461791	P4HB
				ENSP00000397115	H2AFV		ENSP00000440902	H2AFJ					ENSP00000395114	YWHAZ																	ENSP00000433155	RPS3		ENSP00000230050	RPS12
				ENSP00000406901	H2AFV		ENSP00000222690	H2AFV					ENSP00000398599	YWHAZ																	ENSP00000435457	RPS3		ENSP00000369757	RPS6
				ENSP00000364310	H2AFX		ENSP00000308405	H2AFV					ENSP00000416551	YWHAZ																	ENSP00000437105	RPS3
				ENSP00000434024	H2AFX		ENSP00000340708	H2AFV					ENSP00000428381	YWHAZ																	ENSP00000369757	RPS6
				ENSP00000296417	H2AFZ		ENSP00000342714	H2AFV					ENSP00000429041	YWHAZ
				ENSP00000355778	H3F3A		ENSP00000397115	H2AFV					ENSP00000430058	YWHAZ
				ENSP00000355779	H3F3A		ENSP00000406901	H2AFV					ENSP00000430219	YWHAZ
				ENSP00000355780	H3F3A		ENSP00000364310	H2AFX
				ENSP00000355781	H3F3A		ENSP00000434024	H2AFX
				ENSP00000254810	H3F3B		ENSP00000296417	H2AFZ
				ENSP00000465403	H3F3B		ENSP00000330074	HIST1H1B
				ENSP00000465813	H3F3B		ENSP00000339566	HIST1H1C
				ENSP00000466020	H3F3B		ENSP00000244534	HIST1H1D
				ENSP00000466663	H3F3B		ENSP00000307705	HIST1H1E
				ENSP00000467165	H3F3B		ENSP00000297012	HIST1H2AA
				ENSP00000468484	H3F3B		ENSP00000259791	HIST1H2AB
				ENSP00000468714	H3F3B		ENSP00000321389	HIST1H2AC
				ENSP00000339835	H3F3C		ENSP00000367022	HIST1H2AC
				ENSP00000244573	HIST1H1A		ENSP00000473534	HIST1H2AC
				ENSP00000339566	HIST1H1C		ENSP00000341094	HIST1H2AD
				ENSP00000244534	HIST1H1D		ENSP00000303373	HIST1H2AE
				ENSP00000307705	HIST1H1E		ENSP00000352119	HIST1H2AG
				ENSP00000341214	HIST1H1T		ENSP00000366679	HIST1H2AH
				ENSP00000297012	HIST1H2AA		ENSP00000351589	HIST1H2AI
				ENSP00000259791	HIST1H2AB		ENSP00000328484	HIST1H2AJ
				ENSP00000321389	HIST1H2AC		ENSP00000330307	HIST1H2AK
				ENSP00000367022	HIST1H2AC		ENSP00000349873	HIST1H2AL
				ENSP00000473534	HIST1H2AC		ENSP00000352627	HIST1H2AM
				ENSP00000341094	HIST1H2AD		ENSP00000358158	HIST2H2AA3
				ENSP00000303373	HIST1H2AE		ENSP00000475814	HIST2H2AA3
				ENSP00000352119	HIST1H2AG		ENSP00000358155	HIST2H2AA4
				ENSP00000366679	HIST1H2AH		ENSP00000464221	HIST2H2AA4
				ENSP00000351589	HIST1H2AI		ENSP00000228929	HIST2H2AC
				ENSP00000328484	HIST1H2AJ		ENSP00000332194	HIST2H2AC
				ENSP00000330307	HIST1H2AK		ENSP00000355656	HIST3H2A
				ENSP00000349873	HIST1H2AL		ENSP00000233893	HSPE1
				ENSP00000352627	HIST1H2AM		ENSP00000386447	HSPE1
				ENSP00000350275	HIST1H3A		ENSP00000472469	RPS28
				ENSP00000244661	HIST1H3B		ENSP00000472137	UBA52
				ENSP00000439493	HIST1H3C
				ENSP00000366999	HIST1H3D
				ENSP00000367062	HIST1H3D
				ENSP00000353581	HIST1H3E
				ENSP00000444823	HIST1H3F
				ENSP00000439660	HIST1H3G
				ENSP00000358160	HIST1H3H
				ENSP00000329554	HIST1H3I
				ENSP00000352252	HIST1H3J
				ENSP00000358158	HIST2H2AA3
				ENSP00000475814	HIST2H2AA3
				ENSP00000358155	HIST2H2AA4
				ENSP00000464221	HIST2H2AA4
				ENSP00000228929	HIST2H2AC
				ENSP00000332194	HIST2H2AC
				ENSP00000385479	HIST2H3A
				ENSP00000463420	HIST2H3A
				ENSP00000358154	HIST2H3C
				ENSP00000463995	HIST2H3C
				ENSP00000333277	HIST2H3D
				ENSP00000463798	HIST2H3D
				ENSP00000355656	HIST3H2A
				ENSP00000355657	HIST3H3
				ENSP00000432572	RDX
				ENSP00000437140	RDX
				ENSP00000230050	RPS12
				ENSP00000462616	SRSF1
				ENSP00000464883	YWHAE
