# Supplementary material for: A Cell-Based Systems Biology Assessment of Human Blood to Monitor Immune Responses after Influenza Vaccination
Source: PLoS One. 2015 Feb 23;10(2):e0118528. doi: 10.1371/journal.pone.0118528 (PMC4338067; doi:10.1371/journal.pone.0118528)
Supplement: S9 Dataset — (XLSX) [file pone.0118528.s009.xlsx]

## Sheet: shared HD30-HD31 B cell AE d0-1
Down-regulated DE proteins (down ≥1.25x) shared between both TIV-vaccinated donors
	PBMC									T cell									NK									Monocytes									Neutrophils
	d0-1			d0-3			d0-7			d0-1			d0-3			d0-7			d0-1			d0-3			d0-7			d0-1			d0-3			d0-7			d0-1			d0-3			d0-7
	Ensembl Protein ID	Gene Name		Ensembl Protein ID	Gene Name		Ensembl Protein ID	Gene Name		Ensembl Protein ID	Gene Name		Ensembl Protein ID	Gene Name		Ensembl Protein ID	Gene Name		Ensembl Protein ID	Gene Name		Ensembl Protein ID	Gene Name		Ensembl Protein ID	Gene Name		Ensembl Protein ID	Gene Name		Ensembl Protein ID	Gene Name		Ensembl Protein ID	Gene Name		Ensembl Protein ID	Gene Name		Ensembl Protein ID	Gene Name		Ensembl Protein ID	Gene Name
	ENSP00000372126	DEFA1		ENSP00000372126	DEFA1		ENSP00000372126	DEFA1		ENSP00000396730	ACTA2		ENSP00000260356	THBS1		ENSP00000466975	ATP5A1		ENSP00000228825	ARPC3		ENSP00000452858	ANXA2		ENSP00000241052	CAT		ENSP00000235835	AKR7A2		ENSP00000444422	ACTN1		ENSP00000444422	ACTN1		ENSP00000437454	ARHGDIB		ENSP00000327442	FMNL1		ENSP00000363071	DES
	ENSP00000372139	DEFA1		ENSP00000372139	DEFA1		ENSP00000372139	DEFA1		ENSP00000398239	ACTA2					ENSP00000423098	HSPA9		ENSP00000413221	ARPC3		ENSP00000452958	ANXA2		ENSP00000402157	LCP1		ENSP00000339084	AKR7A2		ENSP00000450625	ACTN1		ENSP00000450625	ACTN1		ENSP00000445450	ARHGDIB		ENSP00000465474	FMNL1		ENSP00000253408	GFAP
	ENSP00000372136	DEFA1B		ENSP00000372136	DEFA1B		ENSP00000372136	DEFA1B		ENSP00000393951	ACTB					ENSP00000425598	HSPA9		ENSP00000446598	ARPC3		ENSP00000452981	ANXA2		ENSP00000217652	MYL12A		ENSP00000355377	AKR7A3		ENSP00000450109	AK2		ENSP00000263238	ACTR3		ENSP00000263621	ELANE		ENSP00000267512	RAB15		ENSP00000403962	GFAP
	ENSP00000443526	DEFA1B		ENSP00000443526	DEFA1B		ENSP00000443526	DEFA1B		ENSP00000399487	ACTB								ENSP00000262097	ASAH1		ENSP00000453000	ANXA2		ENSP00000441231	MYL12A		ENSP00000411913	AKR7L		ENSP00000312606	AKR1A1		ENSP00000377833	ANXA4		ENSP00000466090	ELANE		ENSP00000433485	RAB15		ENSP00000465320	GFAP
	ENSP00000328359	DEFA3		ENSP00000328359	DEFA3		ENSP00000328359	DEFA3		ENSP00000401032	ACTB								ENSP00000326970	ASAH1		ENSP00000453356	ANXA2		ENSP00000462171	MYL12A		ENSP00000367265	CKAP4		ENSP00000361140	AKR1A1		ENSP00000386756	ANXA4		ENSP00000225371	EPX		ENSP00000434103	RAB15		ENSP00000465624	GFAP
	ENSP00000287497	ITGAM		ENSP00000225371	EPX		ENSP00000225371	EPX		ENSP00000407473	ACTB								ENSP00000371152	ASAH1		ENSP00000453566	ANXA2		ENSP00000463614	MYL12A		ENSP00000335304	DLST		ENSP00000441931	ANXA4		ENSP00000256935	DOCK2					ENSP00000452195	RAB15		ENSP00000468500	GFAP
	ENSP00000441691	ITGAM		ENSP00000358633	G6PD		ENSP00000452786	ITGB3		ENSP00000409264	ACTB								ENSP00000394125	ASAH1		ENSP00000453694	ANXA2		ENSP00000464359	MYL12A		ENSP00000338095	HNRNPC		ENSP00000265523	BLVRA		ENSP00000429283	DOCK2					ENSP00000463773	RAB15		ENSP00000358865	INA
	ENSP00000233114	MDH1		ENSP00000377192	G6PD		ENSP00000317141	KCTD12		ENSP00000460660	ACTG1								ENSP00000427751	ASAH1		ENSP00000453739	ANXA2		ENSP00000237500	MYL12B		ENSP00000404559	HNRNPC		ENSP00000385757	BLVRA		ENSP00000358633	G6PD					ENSP00000464662	RAB15		ENSP00000311997	NEFH
	ENSP00000377945	MDH1		ENSP00000377194	G6PD		ENSP00000366694	KCTD12		ENSP00000462823	ACTG1								ENSP00000274364	IQGAP2		ENSP00000453770	ANXA2		ENSP00000383037	MYL12B		ENSP00000442816	HNRNPC		ENSP00000246554	COX6B1		ENSP00000377192	G6PD								ENSP00000221166	NEFM
	ENSP00000386719	MDH1		ENSP00000395599	G6PD		ENSP00000450116	MYL6		ENSP00000466346	ACTG1								ENSP00000421097	IQGAP2		ENSP00000377833	ANXA4		ENSP00000463559	MYL12B		ENSP00000450467	HNRNPC		ENSP00000376037	COX6B1		ENSP00000377194	G6PD								ENSP00000410137	NEFM
	ENSP00000386743	MDH1		ENSP00000400648	G6PD		ENSP00000336831	PLS1		ENSP00000471891	ACTG1								ENSP00000423672	IQGAP2		ENSP00000386756	ANXA4		ENSP00000464464	MYL12B		ENSP00000450544	HNRNPC		ENSP00000466818	COX6B1		ENSP00000395599	G6PD								ENSP00000412295	NEFM
	ENSP00000438144	MDH1		ENSP00000469097	G6PD		ENSP00000387890	PLS1		ENSP00000471926	ACTG1											ENSP00000446677	ATP5B		ENSP00000448859	MYL6		ENSP00000450548	HNRNPC		ENSP00000358633	G6PD		ENSP00000400648	G6PD								ENSP00000427872	NEFM
	ENSP00000446395	MDH1		ENSP00000469988	G6PD		ENSP00000417481	PLS1		ENSP00000473053	ACTG1											ENSP00000450297	ATP5B		ENSP00000340278	PARK7		ENSP00000450629	HNRNPC		ENSP00000377192	G6PD		ENSP00000469097	G6PD
				ENSP00000470651	G6PD		ENSP00000418700	PLS1		ENSP00000387182	ACTG2											ENSP00000408921	FLNA		ENSP00000366708	PARK7		ENSP00000450725	HNRNPC		ENSP00000377194	G6PD		ENSP00000469988	G6PD
				ENSP00000470721	G6PD		ENSP00000318012	SET		ENSP00000410020	ACTG2											ENSP00000470861	FLNA		ENSP00000366711	PARK7		ENSP00000451176	HNRNPC		ENSP00000395599	G6PD		ENSP00000470651	G6PD
				ENSP00000471208	G6PD		ENSP00000361771	SET		ENSP00000410706	ACTG2											ENSP00000254301	LGALS3		ENSP00000418770	PARK7		ENSP00000451292	HNRNPC		ENSP00000400648	G6PD		ENSP00000470721	G6PD
				ENSP00000383382	GP1BB		ENSP00000361773	SET		ENSP00000295897	ALB											ENSP00000427976	PPIA		ENSP00000465404	PARK7		ENSP00000451708	HNRNPC		ENSP00000469097	G6PD		ENSP00000471208	G6PD
				ENSP00000393670	HSPD1		ENSP00000361777	SET		ENSP00000384695	ALB											ENSP00000430817	PPIA		ENSP00000466242	PARK7		ENSP00000452021	HNRNPC		ENSP00000469988	G6PD		ENSP00000366018	HLA-A
				ENSP00000303242	ITGB2		ENSP00000387321	SET		ENSP00000401820	ALB											ENSP00000452843	PSME1		ENSP00000270792	SH3BGRL3		ENSP00000452573	HNRNPC		ENSP00000470651	G6PD		ENSP00000373100	HLA-A
				ENSP00000347279	ITGB2		ENSP00000303476	TLN2		ENSP00000421027	ALB											ENSP00000258737	RAC1		ENSP00000363358	SH3BGRL3		ENSP00000354346	MATR3		ENSP00000470721	G6PD		ENSP00000373114	HLA-A
				ENSP00000380948	ITGB2		ENSP00000453508	TLN2		ENSP00000422784	ALB											ENSP00000348461	RAC1		ENSP00000258962	SRSF1		ENSP00000378279	MATR3		ENSP00000471208	G6PD		ENSP00000447990	HLA-A
				ENSP00000380950	ITGB2		ENSP00000448725	TUBA1A		ENSP00000426179	ALB											ENSP00000249071	RAC2		ENSP00000462215	SRSF1		ENSP00000378284	MATR3		ENSP00000333994	HBB		ENSP00000388208	HLA-B
				ENSP00000380952	ITGB2		ENSP00000449460	TUBA1B		ENSP00000466975	ATP5A1											ENSP00000385270	RAC2		ENSP00000462616	SRSF1		ENSP00000422319	MATR3		ENSP00000369671	HBB		ENSP00000392235	HLA-B
				ENSP00000380955	ITGB2		ENSP00000449748	TUBA1B		ENSP00000352980	HIST1H4A											ENSP00000385590	RAC2		ENSP00000463042	SRSF1		ENSP00000423290	MATR3		ENSP00000366018	HLA-A		ENSP00000399168	HLA-B
				ENSP00000225275	MPO		ENSP00000448211	TUBA1C		ENSP00000462355	HIST1H4A											ENSP00000304283	RAC3		ENSP00000463223	SRSF1		ENSP00000423533	MATR3		ENSP00000373100	HLA-A		ENSP00000399675	HLA-B
				ENSP00000344419	MPO					ENSP00000462667	HIST1H4A											ENSP00000462421	RAC3		ENSP00000351777	VCP		ENSP00000426743	MATR3		ENSP00000373114	HLA-A		ENSP00000400842	HLA-B
				ENSP00000464668	MPO					ENSP00000366581	HIST1H4B											ENSP00000463590	RAC3					ENSP00000342026	PRDX6		ENSP00000447990	HLA-A		ENSP00000405931	HLA-B
										ENSP00000367034	HIST1H4C											ENSP00000341905	RASAL3					ENSP00000216962	PYGB		ENSP00000388208	HLA-B		ENSP00000435221	HLA-B
										ENSP00000343282	HIST1H4D											ENSP00000357721	S100A8					ENSP00000331368	SERPINB8		ENSP00000392235	HLA-B		ENSP00000436637	HLA-B
										ENSP00000353624	HIST1H4E											ENSP00000357722	S100A8					ENSP00000381072	SERPINB8		ENSP00000399168	HLA-B		ENSP00000168216	HSD17B10
										ENSP00000366974	HIST1H4F											ENSP00000262878	SAMHD1					ENSP00000370074	SERPINB9		ENSP00000399675	HLA-B		ENSP00000472168	HSD17B10
										ENSP00000289352	HIST1H4H											ENSP00000258962	SRSF1					ENSP00000450765	TUBB3		ENSP00000400842	HLA-B		ENSP00000429475	HSPA9
										ENSP00000366956	HIST1H4H											ENSP00000462215	SRSF1					ENSP00000450822	TUBB3		ENSP00000405931	HLA-B		ENSP00000361405	MMP9
										ENSP00000346316	HIST1H4I											ENSP00000462616	SRSF1					ENSP00000451378	TUBB3		ENSP00000435221	HLA-B		ENSP00000350882	SPTAN1
										ENSP00000347168	HIST1H4J											ENSP00000463042	SRSF1					ENSP00000452554	TUBB3		ENSP00000436637	HLA-B		ENSP00000361816	SPTAN1
										ENSP00000350159	HIST1H4K											ENSP00000463223	SRSF1								ENSP00000372880	HSPA1A		ENSP00000361824	SPTAN1
										ENSP00000348258	HIST1H4L											ENSP00000211998	VCL								ENSP00000393259	HSPA1A		ENSP00000468843	TUBB4A
										ENSP00000358162	HIST2H4A											ENSP00000361841	VCL								ENSP00000410693	HSPA1A		ENSP00000469560	TUBB4A
										ENSP00000376668	HIST2H4A																				ENSP00000415927	HSPA1A		ENSP00000469660	TUBB4A
										ENSP00000376669	HIST2H4A																				ENSP00000477378	HSPA1A		ENSP00000470627	TUBB4A
										ENSP00000476824	HIST2H4A																				ENSP00000263774	NDUFS3		ENSP00000471503	TUBB4A
										ENSP00000358153	HIST2H4B																				ENSP00000336831	PLS1		ENSP00000472375	TUBB4A
										ENSP00000376663	HIST2H4B																				ENSP00000387890	PLS1		ENSP00000454878	TUBB8
										ENSP00000376664	HIST2H4B																				ENSP00000417481	PLS1		ENSP00000457285	TUBB8P7
										ENSP00000350767	HIST4H4																				ENSP00000418700	PLS1
										ENSP00000443017	HIST4H4																				ENSP00000298510	PRDX3
										ENSP00000450712	HSP90AA1																				ENSP00000349432	PRDX3
										ENSP00000423098	HSPA9																				ENSP00000193532	PTPRC
										ENSP00000425598	HSPA9																				ENSP00000306782	PTPRC
										ENSP00000327054	LMNB2																				ENSP00000356346	PTPRC
										ENSP00000462730	LMNB2																				ENSP00000411355	PTPRC
										ENSP00000318195	NCL																				ENSP00000458322	PTPRC
										ENSP00000349410	NCL																				ENSP00000461074	PTPRC
										ENSP00000305556	PCBP1																				ENSP00000471843	PTPRC
										ENSP00000352228	PCBP2																				ENSP00000348546	RAB1A
										ENSP00000352438	PCBP2																				ENSP00000381540	RAB1A
										ENSP00000388008	PCBP2																				ENSP00000386451	RAB1A
										ENSP00000390304	PCBP2																				ENSP00000386672	RAB1A
										ENSP00000394116	PCBP2																				ENSP00000387286	RAB1A
										ENSP00000408949	PCBP2																				ENSP00000310226	RAB1B
										ENSP00000446130	PCBP2																				ENSP00000435195	RAB1B
										ENSP00000446601	PCBP2																				ENSP00000368270	RAP1B
										ENSP00000447068	PCBP2																				ENSP00000443775	RAP1B
										ENSP00000447670	PCBP2																				ENSP00000444467	RAP1B
										ENSP00000448079	PCBP2																				ENSP00000445090	RAP1B
										ENSP00000448762	PCBP2																				ENSP00000472469	RPS28
										ENSP00000448847	PCBP2																				ENSP00000331368	SERPINB8
										ENSP00000448927	PCBP2																				ENSP00000381072	SERPINB8
										ENSP00000449062	PCBP2																				ENSP00000370074	SERPINB9
										ENSP00000449070	PCBP2																				ENSP00000350882	SPTAN1
										ENSP00000456412	PCBP2																				ENSP00000361816	SPTAN1
										ENSP00000475032	PCBP2																				ENSP00000361824	SPTAN1
										ENSP00000383159	PCBP3																				ENSP00000301071	TUBA1A
										ENSP00000383160	PCBP3																				ENSP00000439020	TUBA1A
										ENSP00000383163	PCBP3																				ENSP00000446637	TUBA1A
										ENSP00000383164	PCBP3																				ENSP00000448725	TUBA1A
										ENSP00000383165	PCBP3																				ENSP00000450268	TUBA1A
										ENSP00000383168	PCBP3																				ENSP00000336799	TUBA1B
										ENSP00000401198	PCBP3																				ENSP00000448648	TUBA1B
										ENSP00000084795	RPL18																				ENSP00000449325	TUBA1B
										ENSP00000446634	RPL18																				ENSP00000449460	TUBA1B
										ENSP00000447001	RPL18																				ENSP00000449748	TUBA1B
										ENSP00000447894	RPL18																				ENSP00000301072	TUBA1C
										ENSP00000449204	RPL18																				ENSP00000443475	TUBA1C
										ENSP00000449610	RPL18																				ENSP00000448211	TUBA1C
										ENSP00000271850	TPM3																				ENSP00000450765	TUBB3
										ENSP00000339035	TPM3																				ENSP00000450822	TUBB3
										ENSP00000341653	TPM3																				ENSP00000451378	TUBB3
										ENSP00000357516	TPM3																				ENSP00000452554	TUBB3
										ENSP00000357517	TPM3																				ENSP00000468843	TUBB4A
										ENSP00000357518	TPM3																				ENSP00000469560	TUBB4A
										ENSP00000357520	TPM3																				ENSP00000469660	TUBB4A
										ENSP00000357521	TPM3																				ENSP00000470627	TUBB4A
																															ENSP00000471503	TUBB4A
																															ENSP00000472375	TUBB4A
																															ENSP00000454878	TUBB8
																															ENSP00000457285	TUBB8P7
